# Supplementary material for: Effect of Freeze-Thaw Cycles on Juice Properties, Volatile Compounds and Hot-Air Drying Kinetics of Blueberry
Source: MDPI journal article supplement (doi:10.3390/foods10102362), 2021-10-04
Supplement: s1 [file s1]

## Supplementary Materials

**Table S1.** Mathematical models applied to fit the drying curves.

| Equation                                                                    | Model name           | Parameters    |
|-----------------------------------------------------------------------------|----------------------|---------------|
| $MR = \exp(-k \times t)$                                                    | Newton               | $k$           |
| $MR = \exp(-k \times t^n)$                                                  | Page                 | $k, n$        |
| $MR = \exp[-(k \times t)^n]$                                                | Modified page        | $k, n$        |
| $MR = a \times \exp(-k \times t)$                                           | Henderson and Pabis  | $a, k$        |
| $MR = 1 + a \times t + b \times t^2$                                        | Wang and Singh       | $a, b$        |
| $MR = a \times \exp(-k \times t) + (1-a) \times \exp(-k \times a \times t)$ | Two term exponential | $a, k$        |
| $MR = a \times \exp(-k \times t) + c$                                       | Logarithmic          | $a, k, c$     |
| $MR = a \times \exp(-k_0 \times t) + \exp(-k_1 \times t)$                   | Two-term             | $a, k_0, k_1$ |
| $MR = a \times \exp(-k \times t) + (1-a) \times \exp(-k \times b \times t)$ | Diffusion approach   | $a, b, k$     |

**Table S2.** The fitting models and statistical results for models. FT-1, FT-2, and FT-3 represent the blueberry with freeze-thaw (FT) treatment once, twice, and third times.

| Model Name           | Fresh |          | FT-1  |          | FT-2  |          | FT-3  |          |
|----------------------|-------|----------|-------|----------|-------|----------|-------|----------|
|                      | $R^2$ | RMSE     | $R^2$ | RMSE     | $R^2$ | RMSE     | $R^2$ | RMSE     |
| Newton               | 0.966 | 0.002361 | 0.973 | 0.002264 | 0.969 | 0.002636 | 0.969 | 0.002703 |
| Page                 | 0.995 | 0.000329 | 0.997 | 0.000262 | 0.993 | 0.000562 | 0.996 | 0.000304 |
| Modified page        | 0.995 | 0.000329 | 0.997 | 0.000262 | 0.993 | 0.000562 | 0.996 | 0.000304 |
| Henderson and Pabis  | 0.979 | 0.001524 | 0.983 | 0.001493 | 0.976 | 0.002031 | 0.980 | 0.001745 |
| Wang and Singh       | 1.000 | 0.000016 | 1.000 | 0.000041 | 0.999 | 0.000052 | 0.999 | 0.000080 |
| Two term exponential | 0.994 | 0.000411 | 0.996 | 0.000359 | 0.992 | 0.000695 | 0.995 | 0.000375 |
| Logarithmic          | 1.000 | 0.000010 | 0.998 | 0.000153 | 0.998 | 0.000133 | 0.998 | 0.000142 |
| Two-term             | 0.848 | 0.010827 | 0.876 | 0.010767 | 0.870 | 0.011155 | 0.872 | 0.011179 |
| Diffusion approach   | 0.995 | 0.000351 | 0.997 | 0.000284 | 0.993 | 0.000592 | 0.996 | 0.000358 |

**Table S3.** Parameter of the Wang and Singh model for the correlation of hot-air drying curve of freeze-thaw (FT) treated blueberry fruit at 60 °C. FT-1, FT-2, and FT-3 represent the sample with FT treatment once, twice, and third times.

| Sample | $a \text{ (min}^{-1}\text{)}$ | $b \text{ (min}^{-2}\text{)}$ | $R^2$ | RMSE                 |
|--------|-------------------------------|-------------------------------|-------|----------------------|
| Fresh  | $-1.902 \times 10^{-3}$       | $6.78 \times 10^{-7}$         | 1.000 | $1.6 \times 10^{-5}$ |
| FT-1   | $-2.856 \times 10^{-3}$       | $2.00 \times 10^{-6}$         | 1.000 | $4.1 \times 10^{-5}$ |
| FT-2   | $-2.733 \times 10^{-3}$       | $1.83 \times 10^{-6}$         | 0.999 | $5.2 \times 10^{-5}$ |
| FT-3   | $-2.691 \times 10^{-3}$       | $1.78 \times 10^{-6}$         | 0.999 | $8.0 \times 10^{-5}$ |

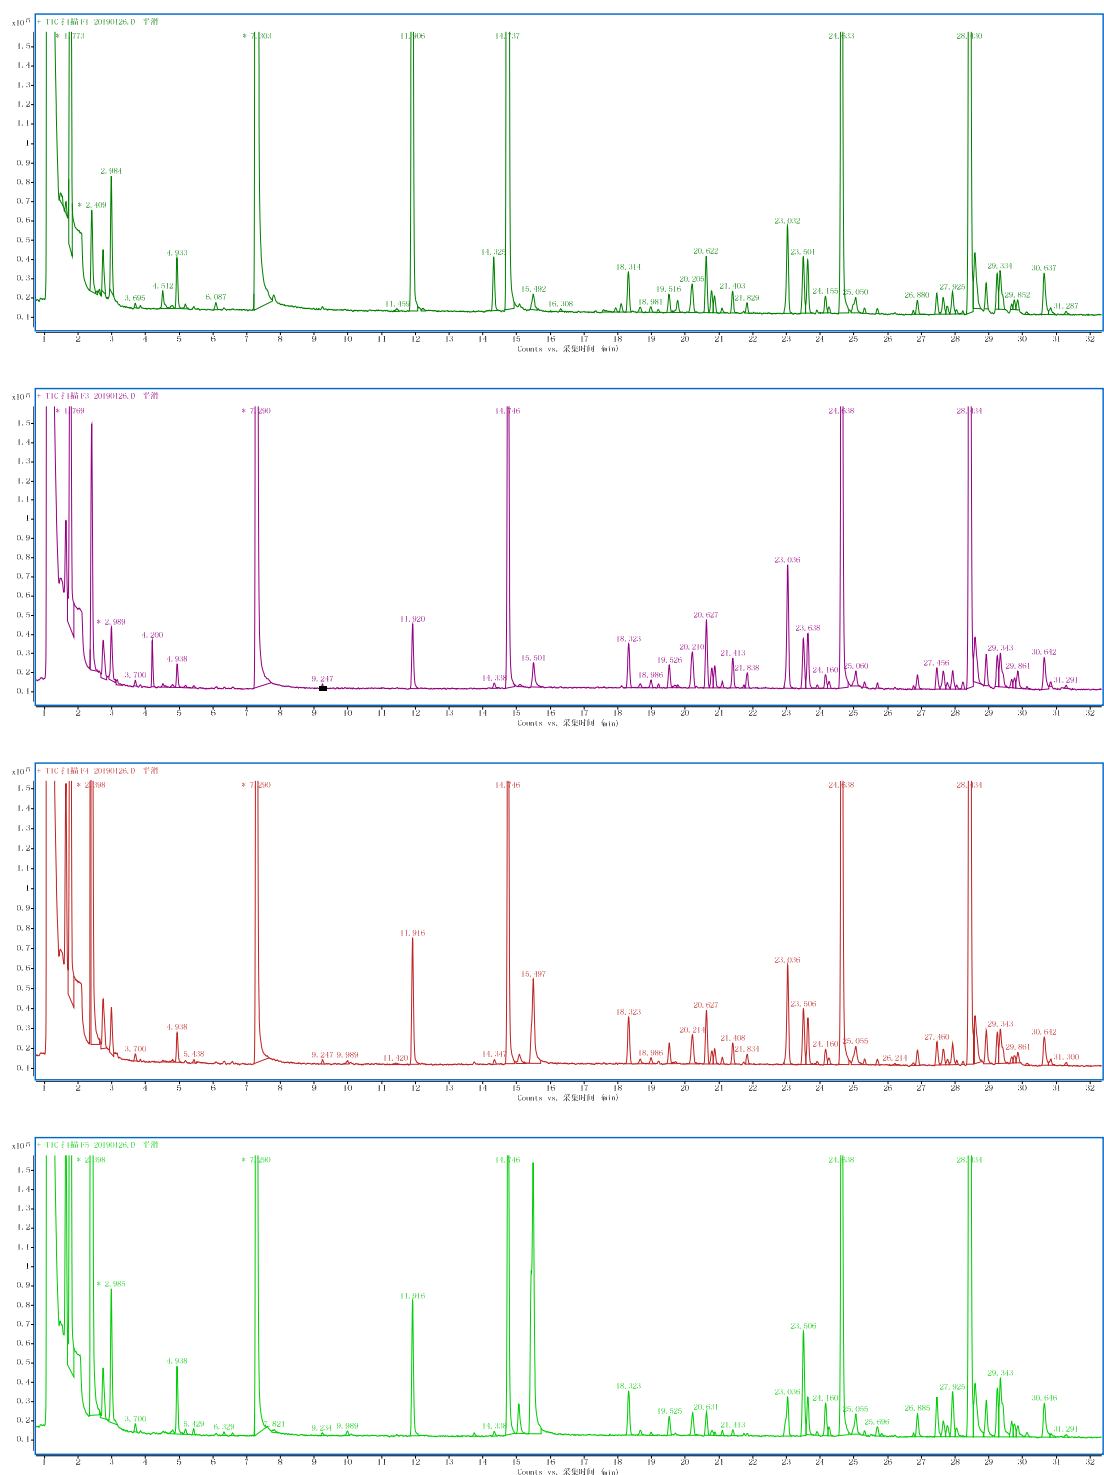

**Figure S1.** The top-down pictures represent the GC-MS base peak chromatogram of the total ion chromatogram (TIC) for the fresh, FT-1, FT-2 and FT-3 samples. FT-1, FT-2, and FT-3 represent the blueberry with freeze-thaw (FT) treatment once, twice, and third times.

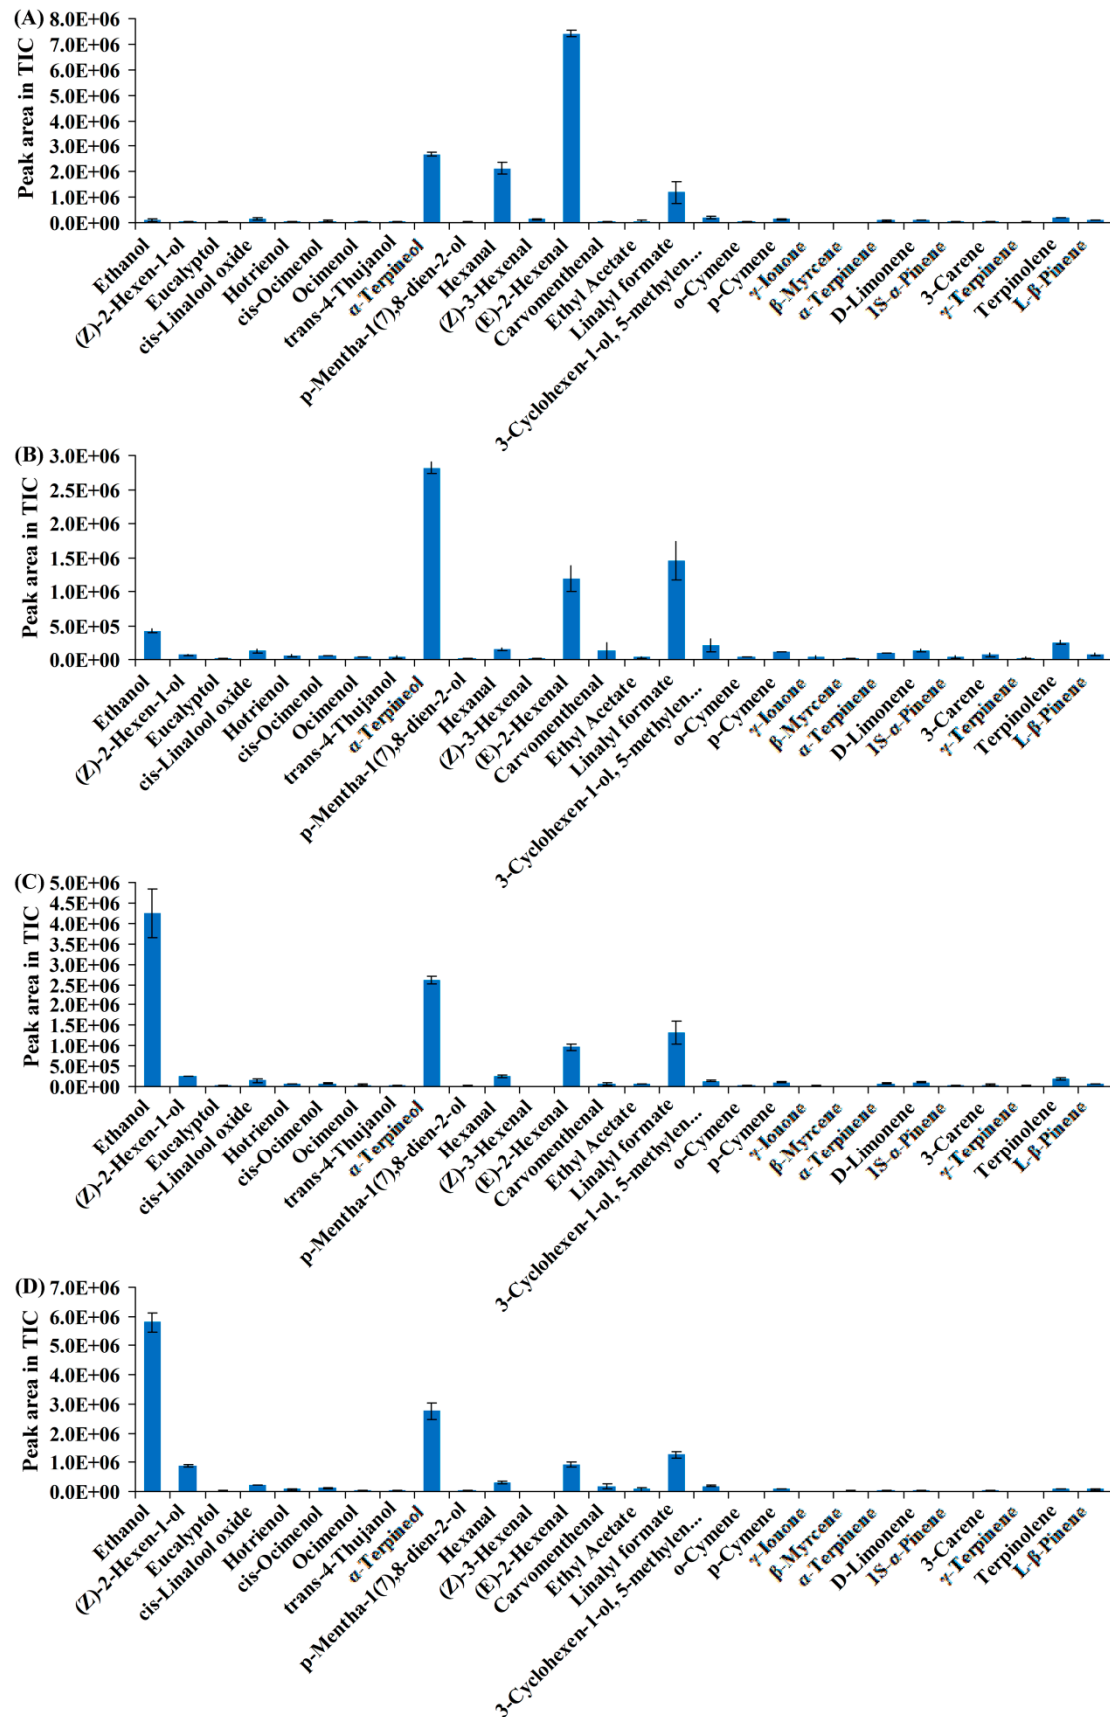

**Figure S2.** Peak area in TIC assigned to each compound for (A) fresh juice, (B) freeze-thaw (FT) once, (C) FT twice, and (D) FT third times.

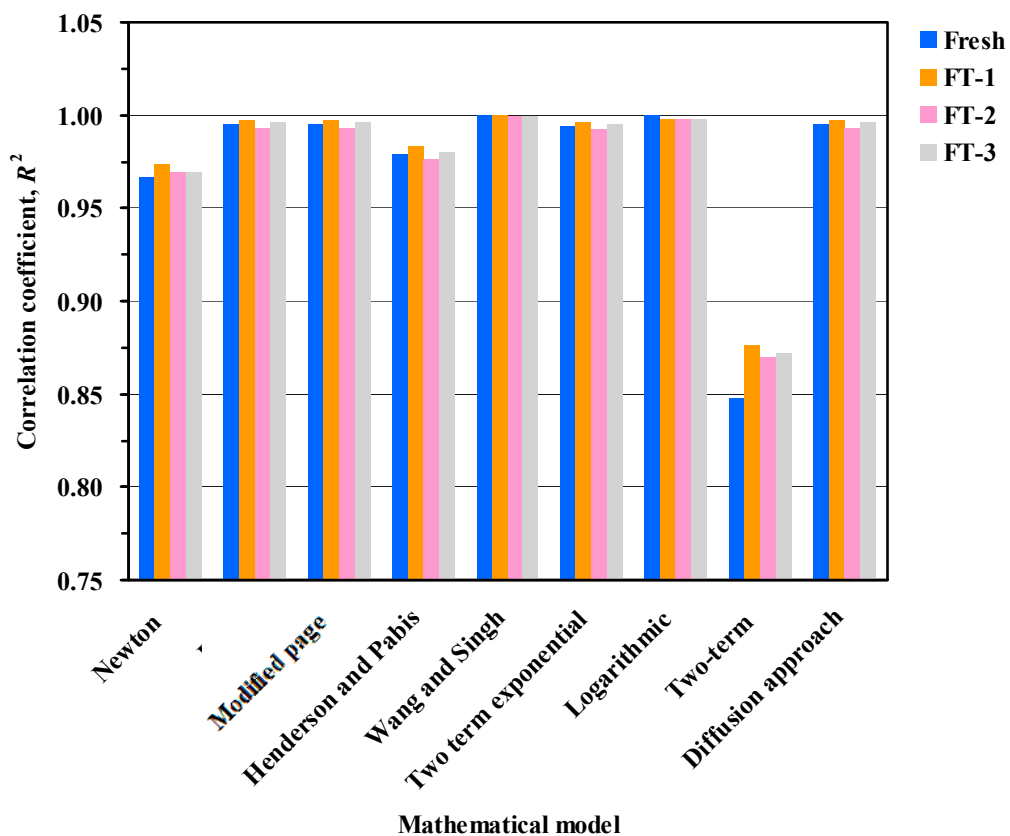

**Figure S3.** The correlation coefficient of a different model for the fitting of the hot-air drying curve of frozen blueberry. FT-1, FT-2, and FT-3 represent the blueberry with freeze-thaw (FT) treatment once, twice, and third times.
